# Supplementary material for: Protective Effects of Peroxiredoxin 4 (PRDX4) on Cholestatic Liver Injury
Source: MDPI journal article supplement (doi:10.3390/ijms19092509), 2018-08-24
Supplement: s1 [file s1]

## Supplementary materials

### Protective Effects of Peroxiredoxin 4 (PRDX4) on Cholestatic Liver Injury

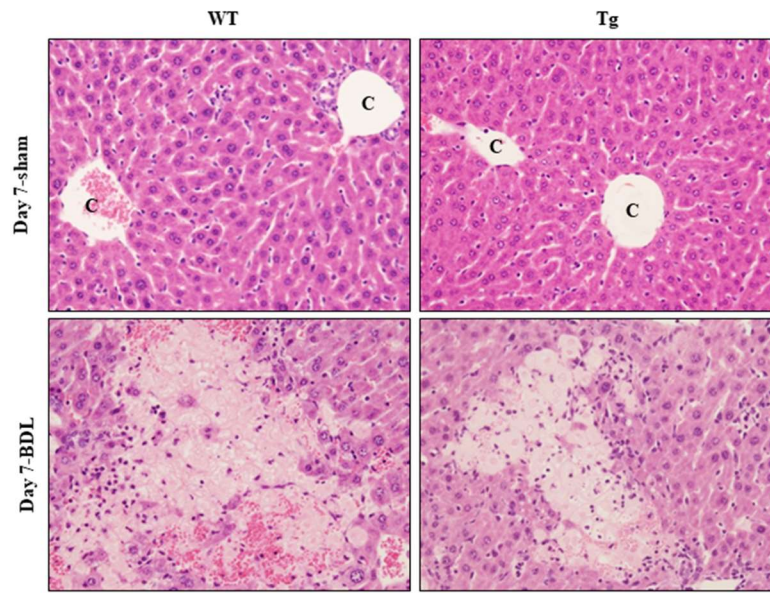

**Figure S1.** Histologic analyses in the liver of mice. Representative photomicrographs (high-power view) of H&E stained sections in the liver of WT or Tg mice on day 7 after sham or BDL surgery. Bar = 100  $\mu$ m,  $n$  = 15. C, central vein.

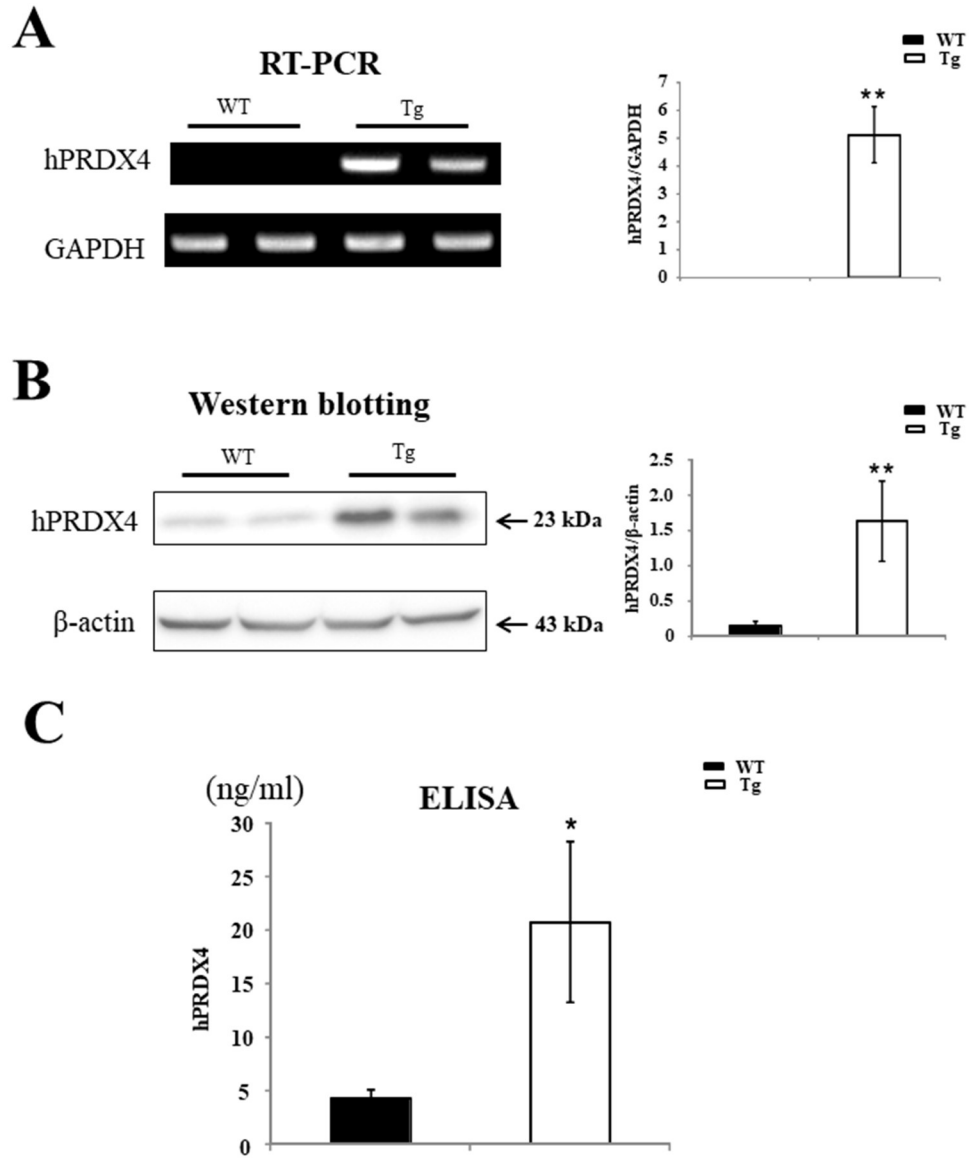

**Figure S2.** The expression of hPRDX4 in BDL mice. The mRNA and protein expression of hPRDX4 in the liver of WT or *hPRDX4<sup>+/+</sup>* mice were examined by RT-PCR (A) and Western blotting (B), respectively. (C) The serum hPRDX4 level was measured by an ELISA kit. *p* values were calculated using Welch's *t*-test. The values represent the mean  $\pm$  SD. \* *p* < 0.05, \*\* *p* < 0.001, *n* = 5.
